# Supplementary material
Source: Research Square preprint supplement (doi:10.21203/rs.3.rs-8039900/v1)
Supplement: Supplementary file 1 [file a69740ec3ab746702b0a717d.docx]

| **Primer Name** | **Sequence** | |
| --- | --- | --- |
| GCG F | GATAATCTTGCCGCCAGGGA | |
| GCG R | TGGCATGCAAAGCAATGTGG | |
| SST F | GCTTTAGGAGCGAGGTTCGG |
| SST R | TGGAGAGTGGCTGGTCAAAC |
| SLC30A10 F | CATTCCCTTTACAATCCCGCT |
| SLC30A10 R | GGAAAAGAGGCCAGGGCTAC |
| SLC22A5 F | CACCATTGTGACCGAGTGGAA |
| SLC22A5 R | GATAATCTTGCCGCCAGGGA |
| 内参-GAPDH F | CGAAGGTGGAGTCAACGGATTT |
| 内参-GAPDH R | ATGGGTGGAATCATATTGGAAC |
